# Supplementary material
Source: PubMed Central journal article supplement (PMC5752306)

# Supplemental Figure

**A** CD45<sup>+</sup>CD11b<sup>+</sup>Siglec-F<sup>+</sup>CD11c<sup>-</sup> Cells of B6  
Resting Lung and Lung Graft of BALB/c → B6 +CSB

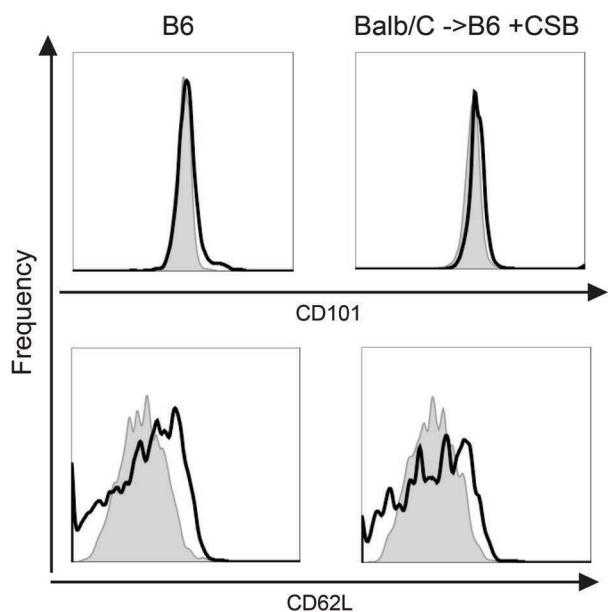

**B** IL-27 and CXCL13 in Peripheral  
Blood and Accepted Lung  
Eosinophil

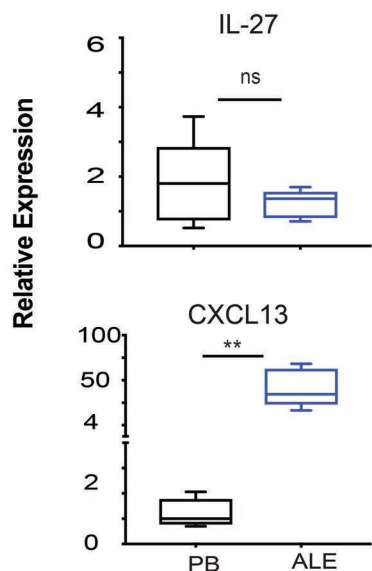

**C** B6 → BALB/c +CSB      B6 → BALB/c<sup>dblGATA</sup> +CSB

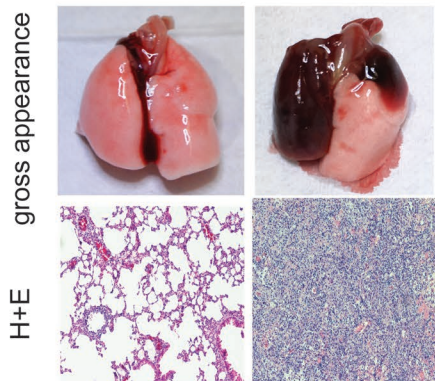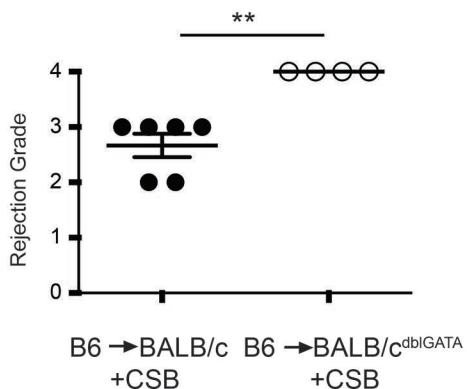

Supplement: jciinsight-2-96455-s001.pdf [file jciinsight-2-96455-s001.pdf]
